# Supplementary material
Source: Springer Nature journal article supplement (https://www.springermedizin.de/resource/supplementary/12936_2007_379_MOESM1_ESM.pdf/9547676)

# A MAP SHOWING LIMPOPO DISTRICTS Zimbabwe

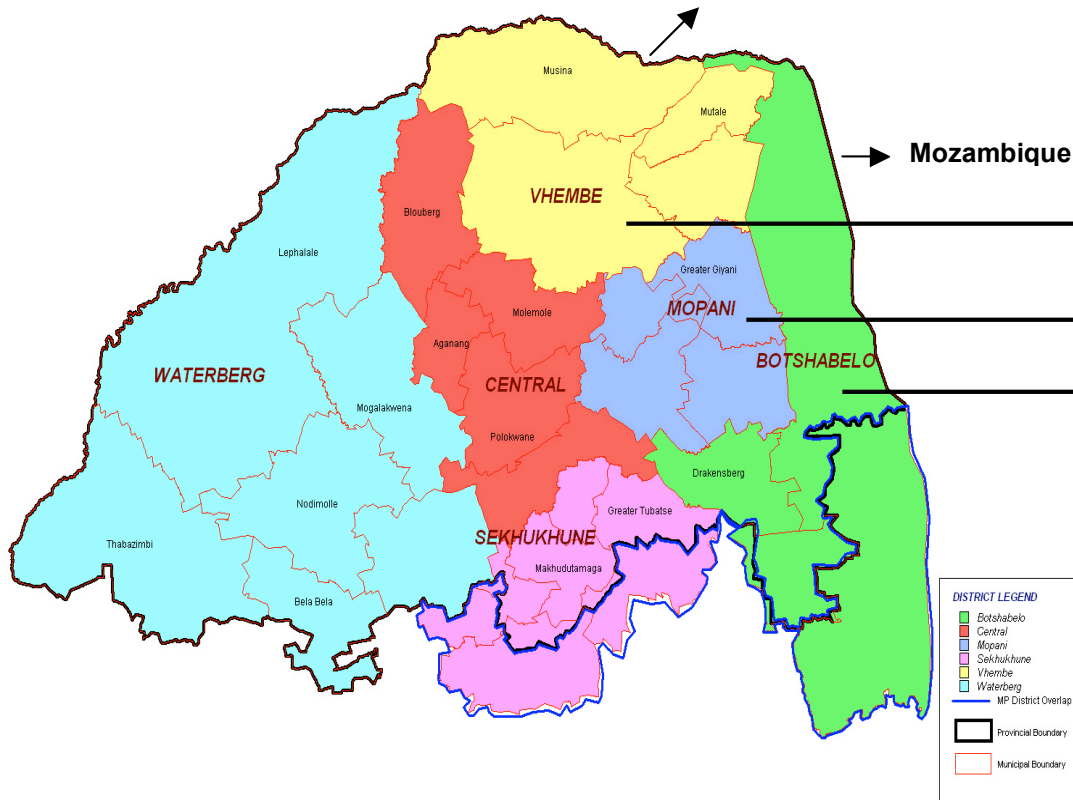

Mozambique

Study districts

Supplement: MOESM1 [file 9547676]
